# Supplementary material
Source: Springer Nature journal article supplement (https://www.springermedizin.de/resource/supplementary/12888_2013_1627_MOESM5_ESM.pdf/9480982)

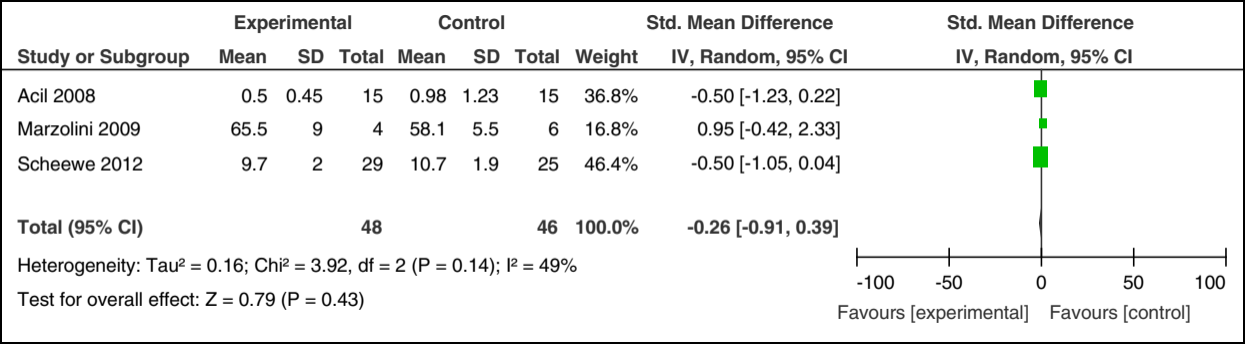

Supplement: MOESM5 [file 9480982]
